# Supplementary material for: Ultrasensitive quantification of PD-L1+ extracellular vesicles in melanoma patient plasma using a parallelized high throughput droplet digital assay
Source: Royal Society of Chemistry journal article supplement (doi:10.1039/d4lc00331d), 2024-01-01
Supplement: d4lc00331d1.pdf [file d4lc00331d1.pdf]

## Supplementary Information

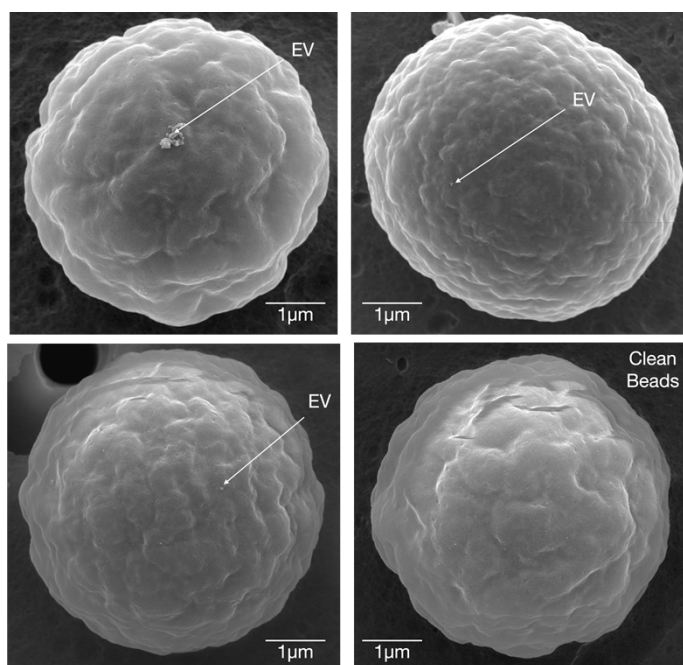

**SI Figure 1. Additional SEM figures indicating one-to-one bead-EV binding, and a clean bead as a reference.**

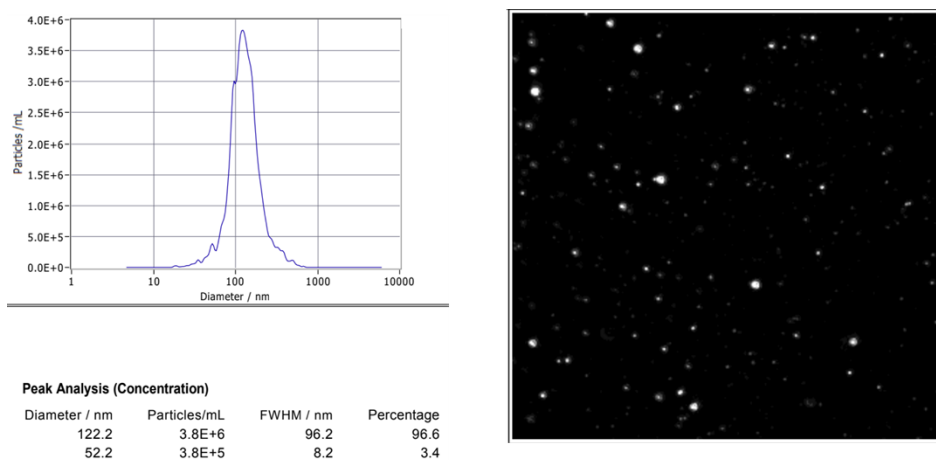

**SI Figure 2. Nanoparticle Tracking Analysis of mel-B7H1 cell culture-derived EVs, purified with Total Exosome Isolation Kit (from cell culture media) (Invitrogen).**

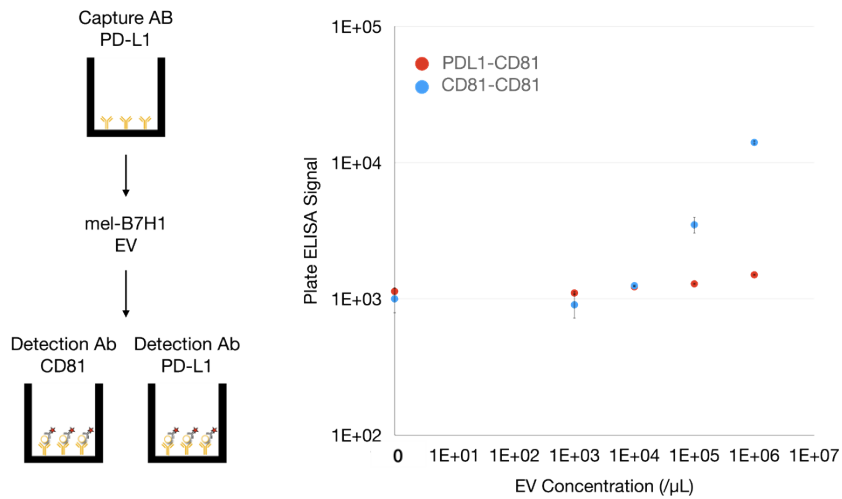

**SI Figure 3. Plate-based sandwich ELISA demonstrated greater amount of mel-B7H1 cell culture-derived EVs express CD81 than PD-L1 on surface.**

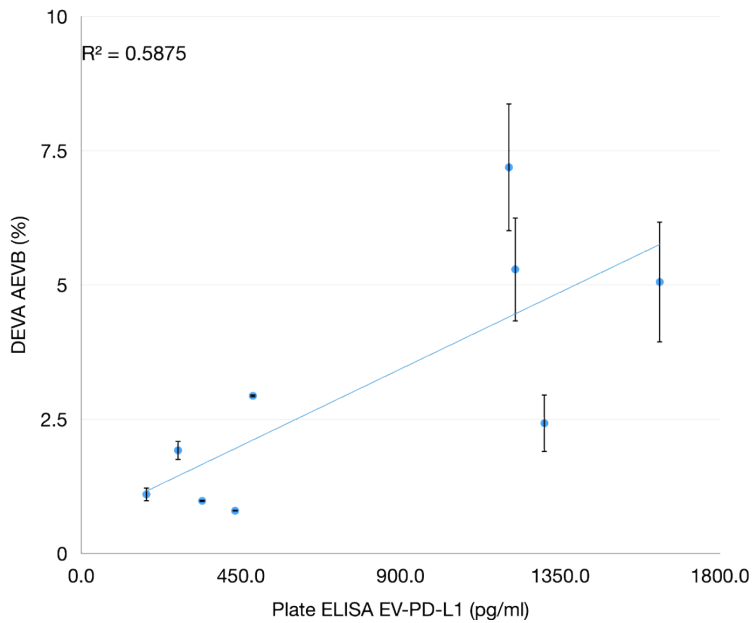

**SI Figure 4. Comparing the signals of DEVA (10µL plasma) and plate sandwich ELISA using 9 patient plasma samples demonstrated positive correlation, with a Pearson correlation coefficient of 0.76 and an  $R^2 = 0.59$**

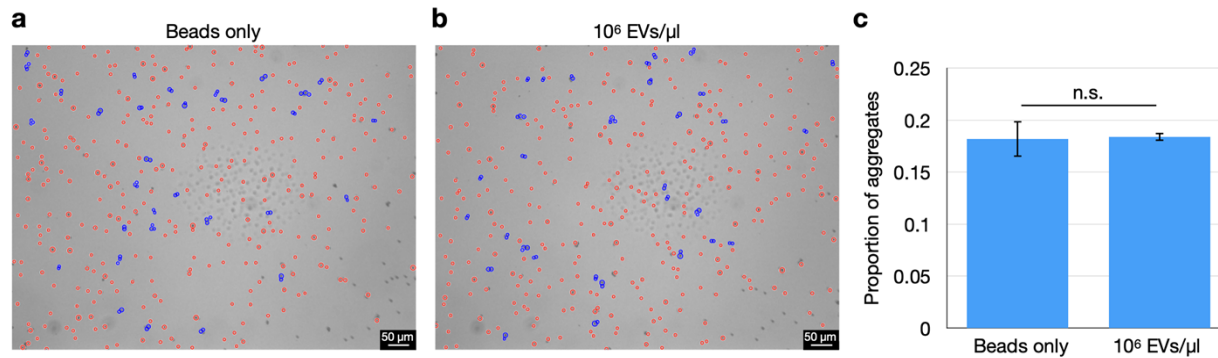

**SI Figure 5. Quantification of bead aggregation due to magnetic washing or EV multivalency.** Micrographs of the antibody functionalized beads used in our assay ( $d = 5.65\mu\text{m}$ , Spherotech) after being incubated alone (a) or co-incubated with  $10^6$  EVs/ $\mu\text{l}$  (b) in the assay buffer overnight, washed 2x using the magnetic stand, and resuspended in 100  $\mu\text{l}$  assay buffer. Red circles label singlets while blue circles label aggregates. (c) The proportion of aggregates compared to single beads remain unchanged with the addition of EVs (N=1400-1800 beads per measurement).
